# Supplementary material for: Preparation of a PVA/Chitosan/Glass Fiber Composite Membrane and the Performance in CO2 Separation
Source: MDPI journal article supplement (doi:10.3390/membranes13010036), 2022-12-28
Supplement: s1 [file s1]

# Preparation of a PVA/Chitosan/Glass Fiber Composite Membrane and the Performance in CO<sub>2</sub> Separation

Yunwu Yu <sup>1,\*</sup>, Chunyang Xie <sup>1</sup>, Yan Wu <sup>1</sup>, Peng Liu <sup>1</sup>, Ye Wan <sup>1</sup>, Xiaowei Sun <sup>1</sup>, Lihua Wang <sup>1</sup> and Yinan Zhang <sup>2</sup>

<sup>1</sup> School of Materials Science and Engineering, Shenyang Jianzhu University, Shenyang 110168, China

<sup>2</sup> Research Center for Nanotechnology, Changchun University of Science and Technology, Changchun 130022, China

\* Correspondence: yuyunwu@sjzu.edu.cn

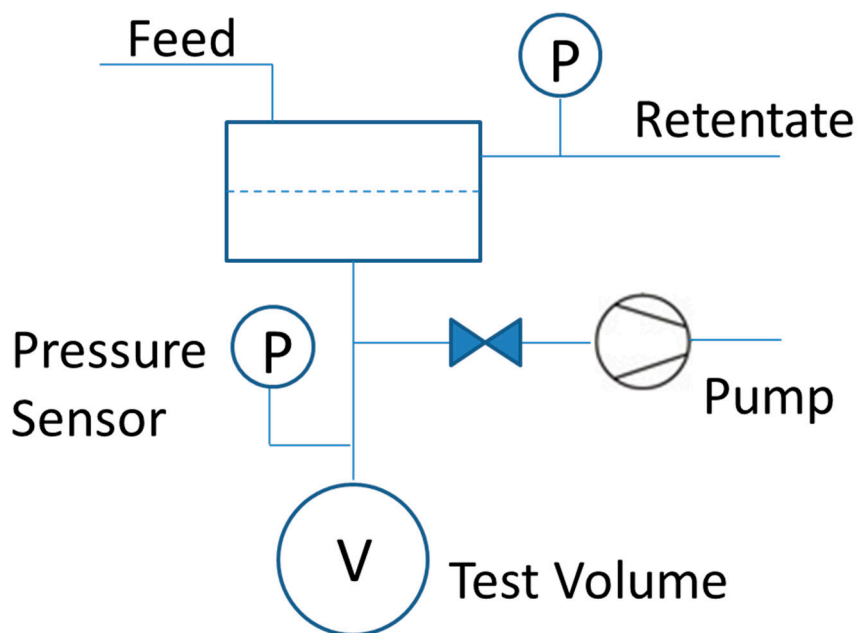

**Figure S1.** General device setup of a constant volume/variable pressure method test system.

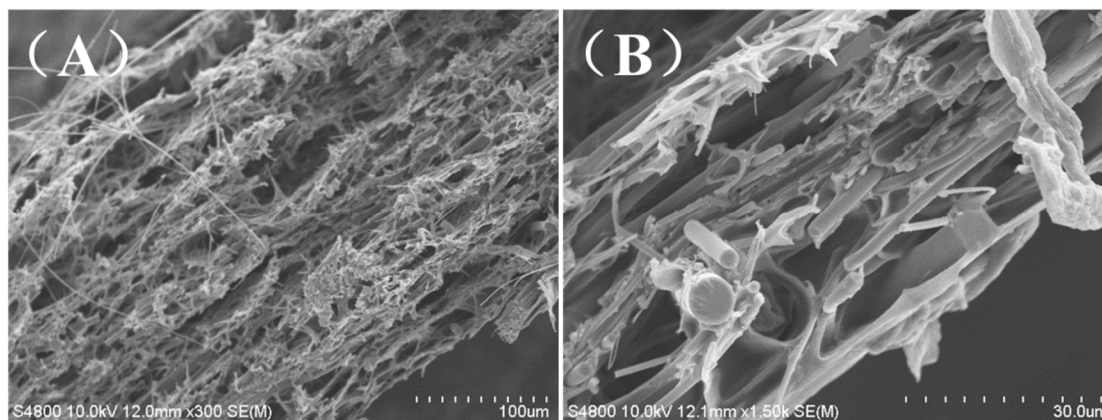

**Figure S2.** The morphology of of the membrane cross section. (A): CS4, (B): CS6.
